# Supplementary material
Source: Springer Nature journal article supplement (https://www.springermedizin.de/resource/supplementary/12961_2008_90_MOESM4_ESM.pdf/9571392)
Supplement: MOESM4 [file 9571392]

**Disease Control**

Cardiovascular  
Cancer  
Neurological  
Infections  
Mental  
Injuries

Women  
Children  
Elderly  
Migrants

**Health Promotion**

Environment  
Occupation  
Food safety  
Nutrition

Tobacco  
Drugs  
Alcohol  
Sexual

**Health Services**

Social security  
Financing  
Policy

Quality  
Safety  
Systems

**Methods**

Surveys Epidemiology  
Health technology assessment
